# Supplementary material for: The Diagnosis of Nontuberculous Mycobacterial Pulmonary Disease by Single Bacterial Isolation Plus Anti-GPL-Core IgA Antibody
Source: PubMed Central journal article supplement (PMC8729764; doi:10.1128/spectrum.01406-21), 2022-01-05

1 **Supplemental Table 1.** Comparison of anti-GPL-core IgA antibody test with the  
 2 diagnosis (2×2 contingency table).  
 3

| All (n = 976)                  |                                |        |
|--------------------------------|--------------------------------|--------|
|                                | Definite                       | Others |
| Anti-GPL-core IgA antibody (+) | 668                            | 31     |
| Anti-GPL-core IgA antibody (-) | 223                            | 54     |
| Total                          | 891                            | 85     |
|                                | Definite/Probable              | Others |
| Anti-GPL-core IgA antibody (+) | 681                            | 18     |
| Anti-GPL-core IgA antibody (-) | 228                            | 49     |
| Total                          | 909                            | 67     |
|                                | Definite/Probable<br>/Possible | Others |
| Anti-GPL-core IgA antibody (+) | 699                            | 0      |
| Anti-GPL-core IgA antibody (-) | 259                            | 18     |
| Total                          | 958                            | 18     |
| MAC (n = 930)                  |                                |        |
|                                | Definite                       | Others |
| Anti-GPL-core IgA antibody (+) | 640                            | 30     |
| Anti-GPL-core IgA antibody (-) | 208                            | 52     |
| Total                          | 848                            | 82     |
|                                | Definite/Probable              | Others |
| Anti-GPL-core IgA antibody (+) | 653                            | 17     |
| Anti-GPL-core IgA antibody (-) | 213                            | 47     |
| Total                          | 866                            | 64     |
|                                | Definite/Probable<br>/Possible | Others |
| Anti-GPL-core IgA antibody (+) | 670                            | 0      |
| Anti-GPL-core IgA antibody (-) | 242                            | 18     |
| Total                          | 912                            | 18     |
| MAB (n = 46)                   |                                |        |

|                                |                                |        |
|--------------------------------|--------------------------------|--------|
|                                | Definite                       | Others |
| Anti-GPL-core IgA antibody (+) | 28                             | 1      |
| Anti-GPL-core IgA antibody (-) | 15                             | 2      |
| Total                          | 43                             | 3      |
|                                | Definite/Probable              | Others |
| Anti-GPL-core IgA antibody (+) | 28                             | 1      |
| Anti-GPL-core IgA antibody (-) | 15                             | 2      |
| Total                          | 43                             | 3      |
|                                | Definite/Probable<br>/Possible | Others |
| Anti-GPL-core IgA antibody (+) | 29                             | 0      |
| Anti-GPL-core IgA antibody (-) | 17                             | 0      |
| Total                          | 46                             | 0      |

4 Definition of abbreviations: MAC, *Mycobacterium avium* complex; MAB,  
5 *Mycobacterium abscessus* and its subspecies *abscessus*, subsp. *massiliense*, and subsp.  
6 *bolletii*.  
7

8 **Supplemental Figure 1. Differences in anti-GPL-core IgA antibody levels among**  
9 **diagnostic categories of NTM-PD.**

10 Anti-GPL-core IgA antibody levels (U/ml) were compared among “Definite”, “Probable”,  
11 “Possible” MAC- or MAB-PD and “Contamination”. Data are presented as box plot.  
12 Comparison among groups were conducted by the Steel-Dwass test. \* $p < 0.05$ .

13

14 **Supplemental Figure 2. Relationship between anti-GPL-core IgA antibody levels**  
15 **and NICE scores.**

16 Correlation between anti-GPL-core IgA antibody levels and NICE scores in patients with  
17 “possible MAC- or MAB-PD.” Linear regression line (blue) and 95% confidence interval  
18 (shaded area) are shown.  $\rho$ , Spearman’s rank correlation coefficients (A). NICE scores in  
19 anti-GPL-core IgA antibody-positive and -negative patients with “possible MAC- or  
20 MAB-PD.” Data are presented as box plot. Comparison between two groups were  
21 conducted by the Mann-Whitney U test (B). \* $p < 0.05$ .

22

Supplemental Figure 1

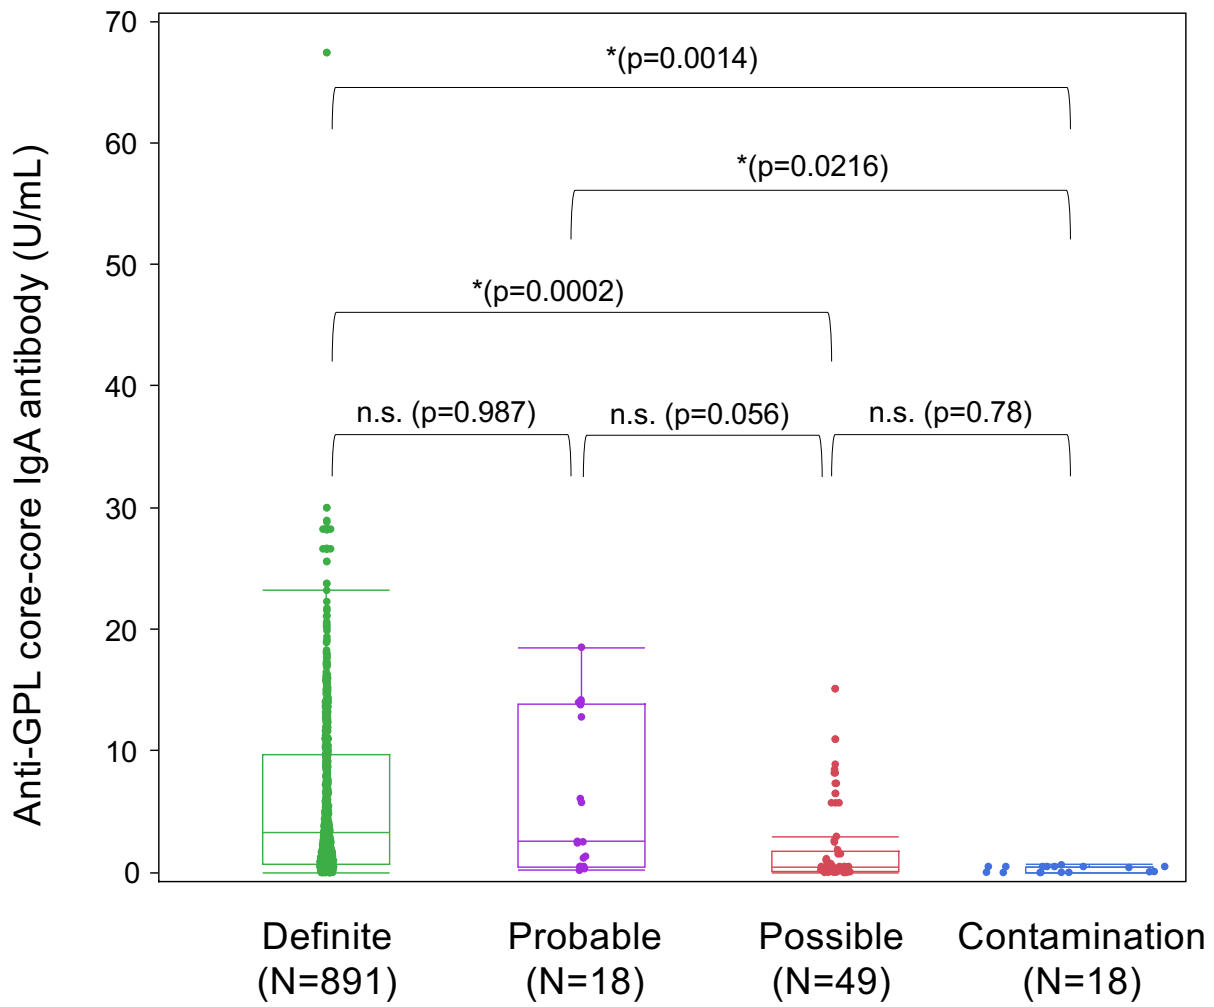

Supplemental Figure 2

**A**

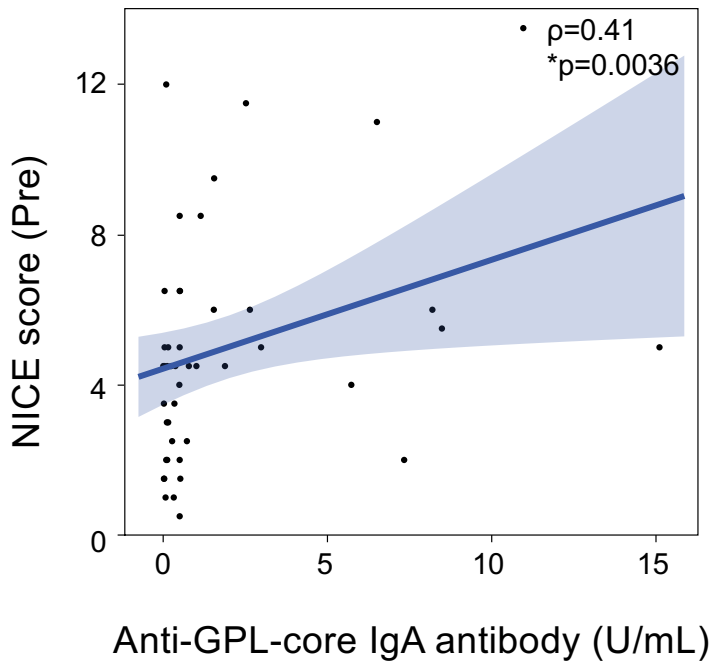

**B**

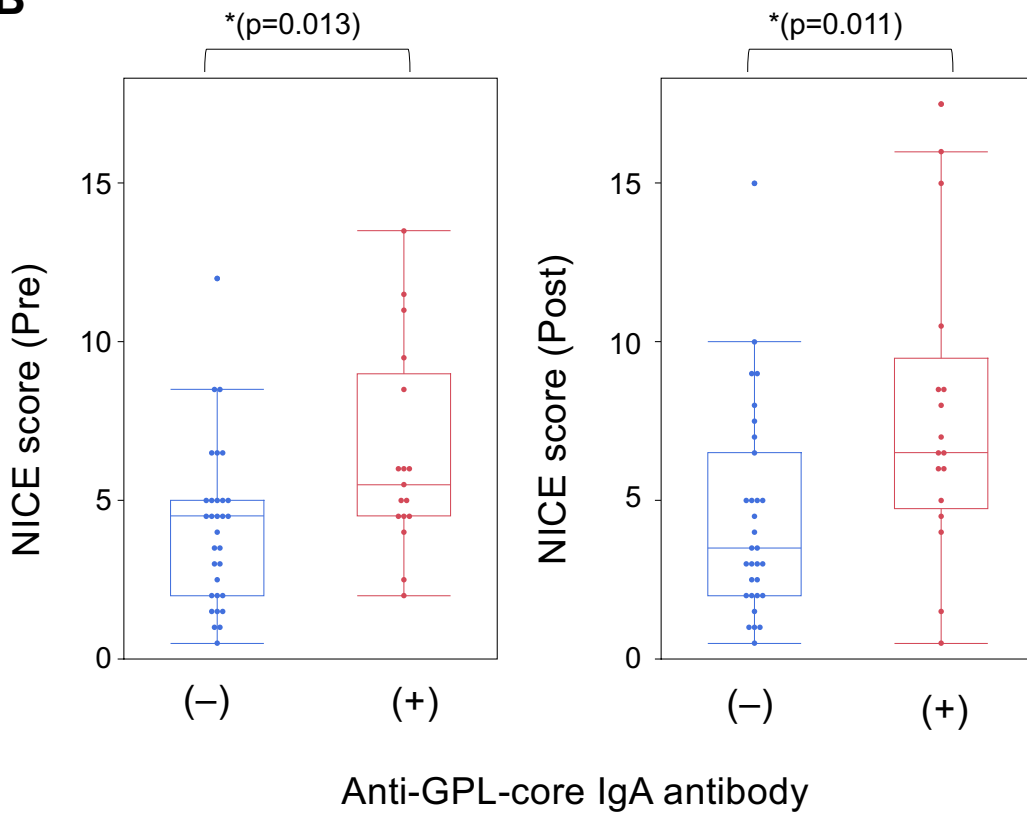

Supplement: spectrum01406-21_supp_1_seq8.pdf [file spectrum01406-21_supp_1_seq8.pdf]
